# Supplementary material for: Defining the frequency of human papillomavirus and polyomavirus infection in urothelial bladder tumours
Source: PubMed Central journal article supplement (PMC6062511; doi:10.1038/s41598-018-29438-y), 2018-07-26

**SREP-17-54867**

**Defining the frequency of human papillomavirus and polyomavirus infection in urothelial bladder tumours**

Matthew A. Llewellyn, Naheema S. Gordon, Ben Abbotts, Nicholas D. James, Maurice P. Zeegers, KK Cheng, Andrew Macdonald, Sally Roberts, Joanna L. Parish, Douglas G. Ward, Richard T. Bryan.

**SUPPLEMENTAL INFORMATION**

**Table S1. Primer, probe and plasmid insert sequences.** R=AG; Y=CT; K=GT; S = CG; W=AT; M=AC.

| Name               | Sequence                                                                                                                  | Assay        |
|--------------------|---------------------------------------------------------------------------------------------------------------------------|--------------|
| HPV16 E6 Forward   | GAACAGCAATACAACAAACC                                                                                                      | HPV16 qPCR   |
| HPV16 E6 Reverse   | GATCTGCAACAAGACATACA                                                                                                      | HPV16 qPCR   |
| HPV16 E6 Probe     | FAM-CTGTCAAAAGCCACTGTGTC-BHQ                                                                                              | HPV16 qPCR   |
| HPV18 E7 Forward   | GTTGACCTTCTATGTCACGA                                                                                                      | HPV18 qPCR   |
| HPV18 E7 Reverse   | CAATTCTGGCTTCACACTTA                                                                                                      | HPV18 qPCR   |
| HPV18 E7 Probe     | FAM-CAATTAAGCGACTCAGAGGAA-BHQ                                                                                             | HPV18 qPCR   |
| GAPDH Forward      | GCTCAAGGGAGATAAAATTC                                                                                                      | qPCR Control |
| GAPDH Reverse      | CGACCAAATCTAAGAGACAA                                                                                                      | qPCR Control |
| GAPDH Probe        | VIC-CCTAGGGCTGCTCACATATT-BHQ                                                                                              | qPCR Control |
| HPyV Forward       | GGGGACCTARTTGCYASTGT                                                                                                      | HPyV qPCR    |
| HPyV Reverse       | GCAASRGATGCAAKTTSMAC                                                                                                      | HPyV qPCR    |
| HPyV Probe         | FAM-ACWGGATTTTCAGTRGCTGAAATTGCTGCTGG-BHQ                                                                                  | HPyV qPCR    |
| JCV plasmid insert | GGGGACCTAGTTGCTACTGTTTCTGAGGCTGCTGCTGCCACAGGATTTTCA<br>GTAGCTGAAATTGCTGCTGGAGAGGCTGCTGCTACTATAGAAGTTGAAATT<br>GCATCCCTTGC | HPyV qPCR    |
| BKV plasmid insert | GGGGACCTAGTTGCCAGTGTATCTGAGGCTGCTGCTGCCACAGGATTTTCA<br>GTGGCTGAAATTGCTGCTGGGGAGGCTGCTGCTGCTATAGAAGTTCAAAT<br>TGCATCCCTTGC | HPyV qPCR    |
| HPV16 E6 Forward   | TGTTTCAGGACCCACAGGAG                                                                                                      | RT-PCR       |
| HPV16 E6 Reverse   | CTGTTGCTTGCACTACACACA                                                                                                     | RT-PCR       |
| HPV16 E7 Forward   | CCGGACAGAGCCCATTACAA                                                                                                      | RT-PCR       |
| HPV16 E7 Reverse   | TCTGAGAACAGATGGGGCAC                                                                                                      | RT-PCR       |
| BKV LT Forward     | ATACACAGCAAAGCAGGCAAG                                                                                                     | PCR          |
| BKV LT Reverse     | GGTGCCAACCTATGGAACAGA                                                                                                     | PCR          |
| BKV ST Forward     | ACATAGCATGCAAGGGCAGT                                                                                                      | PCR          |
| BKV ST Reverse     | GAGCTGCCTGGGGAAATCTT                                                                                                      | PCR          |
| BKV VP1 Forward    | CTGTACGACAAGCTTCAGT                                                                                                       | PCR          |
| BKV VP1 Reverse    | ACAGCAGGTAAAGCAGTGGTA                                                                                                     | PCR          |
| BKV VP2 Forward    | CCTTGCTACTGTAGAGGGCAT                                                                                                     | PCR          |
| BKV VP2 Reverse    | ACCCTACTTGAGCTAAGGAACT                                                                                                    | PCR          |

**Figures S1a and b. HPV qPCR performance.** Separate 2-fold dilution series of HeLa DNA (upper panel, HPV18 positive) and UM-SCC-47 DNA (lower panel, HPV16 positive) were made using UM-SCC-40 DNA (HPV negative) as diluent (10 ng total DNA per reaction). Hollow symbols = HPV, filled symbols = GAPDH.

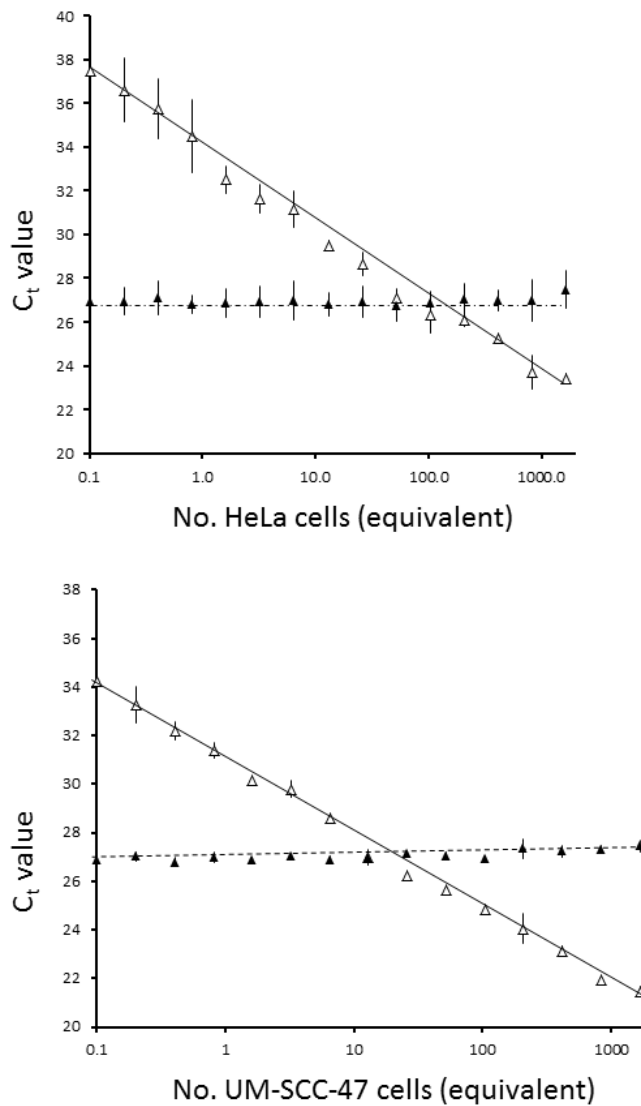

**Figure S2. HPyV qPCR performance.** Separate 10-fold dilution series of BKV plasmid (filled symbols) and JCV plasmid were made using UM-SCC-40 DNA (HPyV negative) as diluent (10 ng total DNA per reaction).

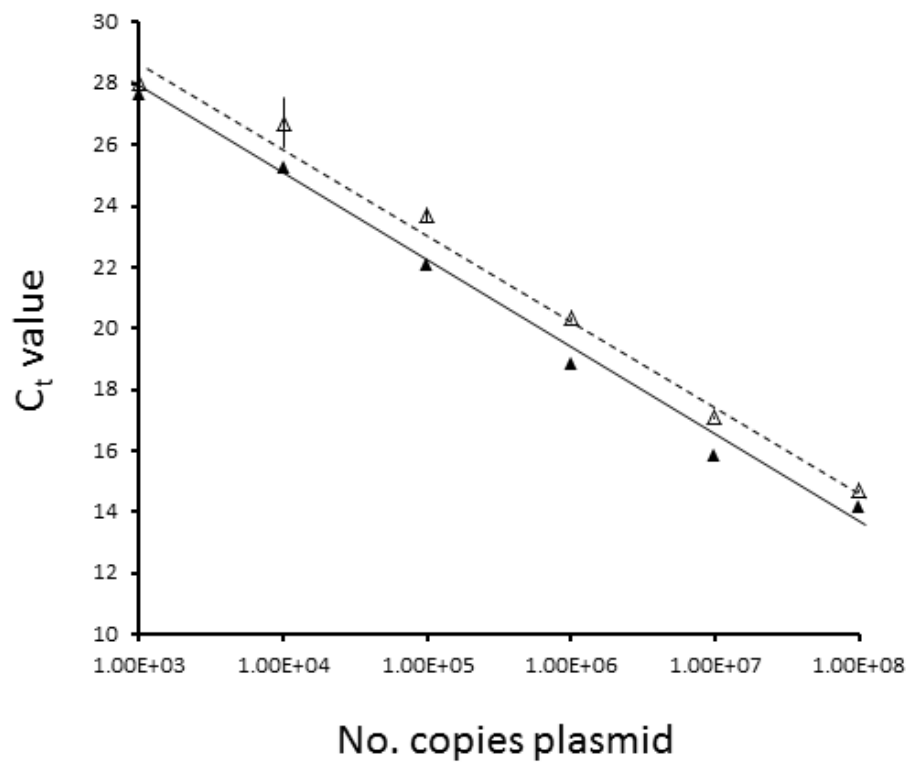

**Figure S3. HPyV Sanger sequencing.** Representative sequences of HPyV PCR products from DNA extracted from bladder tumours. The arrows indicate the 3 bases which discriminate between BKV and JCV.

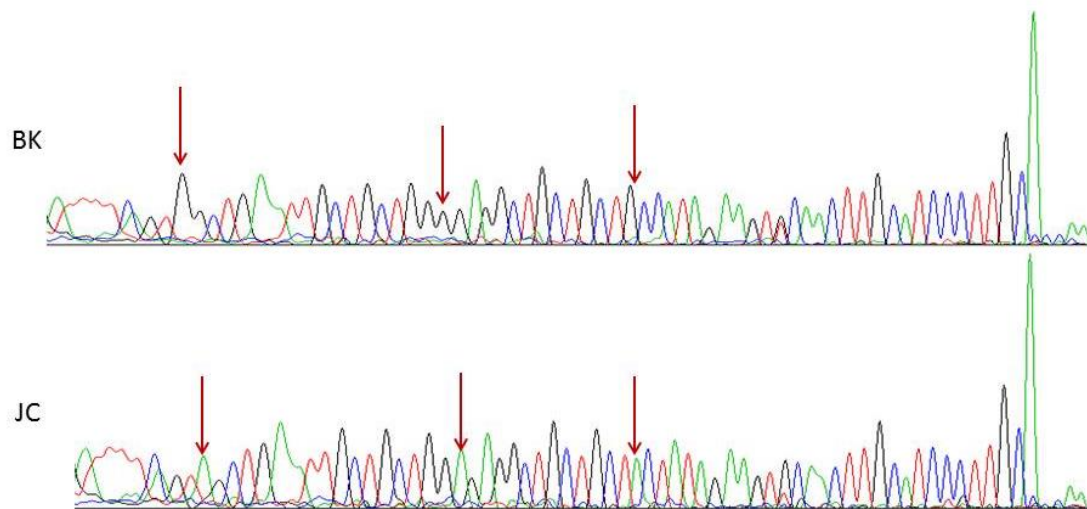

**Figure S4. Uncropped versions of gels shown in main manuscript.**

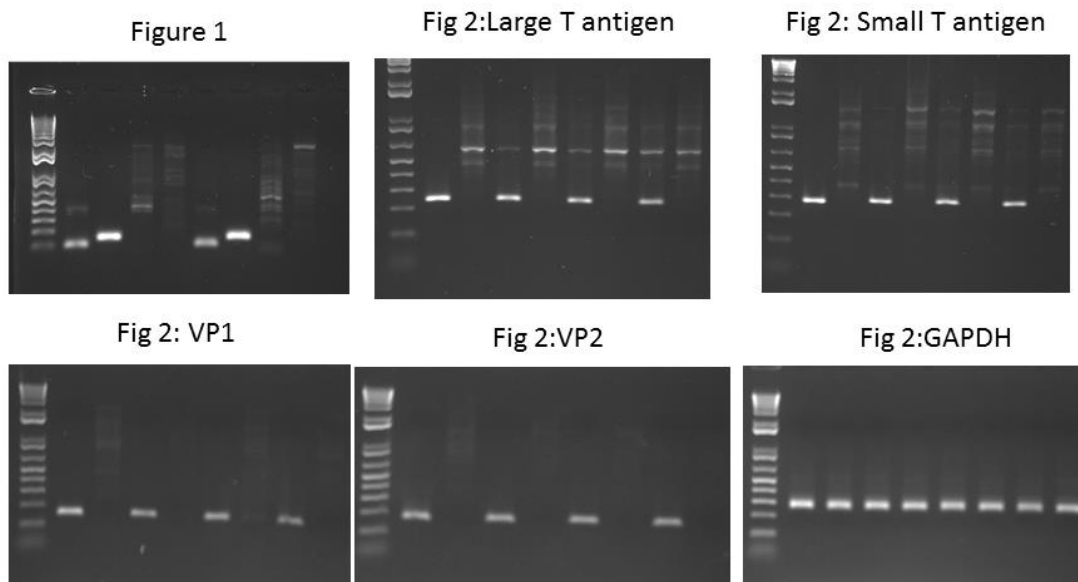

**Figure S5. Immunohistochemistry antibody validation. Primary human kidney cells infected (A) or not infected (B) with BKV.**

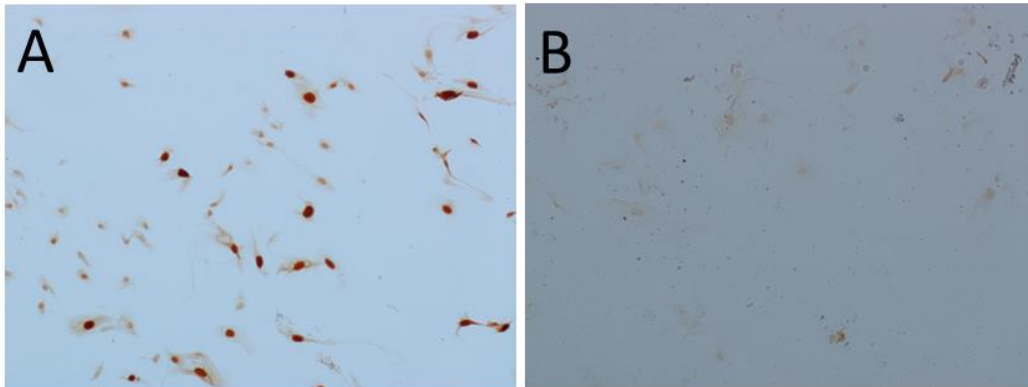

Supplement: 41598_2018_29438_MOESM1_ESM.pdf [file 41598_2018_29438_MOESM1_ESM.pdf]
